# Supplementary material for: Volatile Organic Compounds of Streptomyces sp. TOR3209 Stimulated Tobacco Growth by Up-Regulating the Expression of Genes Related to Plant Growth and Development
Source: Frontiers journal article supplement (doi:10.3389/fmicb.2022.891245), 2022-05-20
Supplement: Image_1.pdf [file Image_1.pdf]

## Supplementary Figure

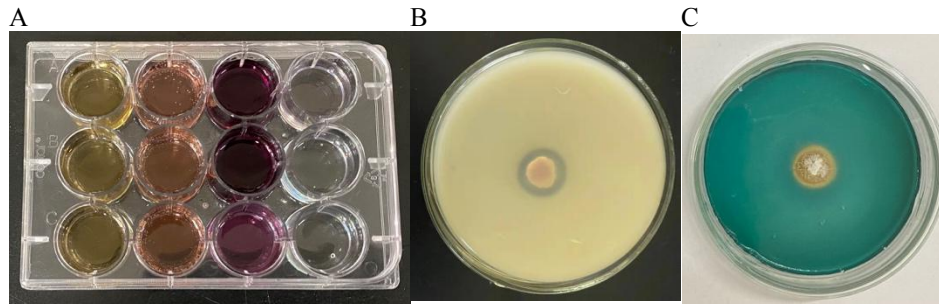

**Fig. 1.** Tests for the PGPR traits of *Streptomyces* sp. TOR3209. A: Auxin production; B: Dissolving organophosphate function; C: Siderophore production.
