# Supplementary material for: Volatile Organic Compounds of Streptomyces sp. TOR3209 Stimulated Tobacco Growth by Up-Regulating the Expression of Genes Related to Plant Growth and Development
Source: Frontiers journal article supplement (doi:10.3389/fmicb.2022.891245), 2022-05-20
Supplement: Table_1.pdf [file Table_1.pdf]

## Supplementary tables

**Supplementary Table 1.** Growth promoting of tobacco by TOR3209 inoculation\*

| Treatment | Total fresh weight (g) |            |
|-----------|------------------------|------------|
|           | Inoculation            | Co-culture |
| CK        | 0.10a                  | 0.05a      |
| TOR3209   | 0.12a                  | 0.10b      |
| Increase  | 20%                    | 100%       |

\*. The same letter followed the values in the same column means no significant difference based on the least significant difference (LSD) test ( $p < 0.05$ ).

**Supplementary Table 2.** VOCs detected from the metabolites of *Streptomyces* sp. TOR3209

| R.T. (min) | VOCs                  | Effect             | Description of effects                                                                                                                                                                                                                     | Relative abundance | Reference               |
|------------|-----------------------|--------------------|--------------------------------------------------------------------------------------------------------------------------------------------------------------------------------------------------------------------------------------------|--------------------|-------------------------|
| 0.946      | Carbon dioxide        | Disease resistance | Production of volatile metabolites from <i>Streptomyces albidoflavus</i> cultivated on gypsum board and tryptone glucose extract agar-influence of temperature, oxygen and carbon dioxide levels.                                          | 1.84%              | (Sunesson et al., 1997) |
| 1.08       | Ethyl alcohol         | Disease resistance | Identification of rhizospheric actinomycete <i>Streptomyces lavendulae</i> SPS-33 and the inhibitory effect of its volatile organic compounds against <i>Ceratocystis fimbriata</i> in postharvest sweet potato ( <i>Ipomoea batatas</i> ) | 1.35%              | (Li et al., 2020)       |
| 1.302      | Acetic acid           | Unknown            |                                                                                                                                                                                                                                            | 0.53%              |                         |
| 1.799      | Silanediol, dimethyl- | Unknown            |                                                                                                                                                                                                                                            | 0.28%              |                         |
| 2.244      | 1-Butanol, 3-methyl-  | PGPR               | Effects of 3-methyl-1-butanol on seed germination and seedling growth of maize and wheat                                                                                                                                                   | 0.51%              | (Li et al., 2018)       |
| 2.397      | Disulfide, dimethyl   | Disease resistance | Fumigant activity of volatiles of <i>Streptomyces globisporus</i> JK-1 against <i>Penicillium italicum</i> on Citrus microcarpa                                                                                                            | 0.42%              | (Li et al., 2010)       |
| 6.952      | Dimethyl trisulfide   | Disease resistance | Identification of Rhizospheric Actinomycete <i>Streptomyces lavendulae</i> SPS-33 and the Inhibitory Effect of its Volatile Organic Compounds against <i>Ceratocystis fimbriata</i> in Postharvest Sweet Potato ( <i>Ipomoea batatas</i> ) | 0.33%              | (Li et al., 2020)       |
| 9.051      | Benzeneacetaldehyde   | Unknown            |                                                                                                                                                                                                                                            | 0.77%              |                         |
| 11.068     | Phenylethyl Alcohol   | PGPR               | Identification of microbial volatile organic compounds and their effect in <i>A. thaliana</i> 's growth                                                                                                                                    | 0.74%              | (Rivas et al., 2018)    |

|        |                                                                                                                           |                    |                                                                                                                                                                                                                                            |        |                           |
|--------|---------------------------------------------------------------------------------------------------------------------------|--------------------|--------------------------------------------------------------------------------------------------------------------------------------------------------------------------------------------------------------------------------------------|--------|---------------------------|
| 12.455 | Cyclopentasiloxane, decamethyl-                                                                                           | Disease resistance | Identification of Rhizospheric Actinomycete <i>Streptomyces lavendulae</i> SPS-33 and the Inhibitory Effect of its Volatile Organic Compounds against <i>Ceratocystis fimbriata</i> in Postharvest Sweet Potato ( <i>Ipomoea batatas</i> ) | 0.53%  | (Li et al., 2020)         |
| 13.969 | 2-Cyclopenten-1-one, 3,4-dimethyl-                                                                                        | Disease resistance | Geosmin and Related Volatiles in Bioreactor-Cultured <i>Streptomyces citreus</i> CBS 109.60)                                                                                                                                               | 0.25%  | (Pollak and Berger, 1996) |
| 14.313 | 1H-Indene, 1-ethylideneoctahydro-7a-methyl-, cis-                                                                         | Unknown            |                                                                                                                                                                                                                                            | 2.44%  |                           |
| 14.554 | Cyclohexane, 1,1,4,4-tetramethyl-2,5-dimethylene-                                                                         | Disease resistance | Effect of volatile substances of <i>Streptomyces platensis</i> F-1 on controlof plant fungal diseases                                                                                                                                      | 0.58%  | (Wan et al., 2008)        |
| 15.057 | cis,cis,cis-Perhydroacenaphtene                                                                                           | Unknown            |                                                                                                                                                                                                                                            | 0.68%  |                           |
| 18.028 | 5-Eicosene, (E)-                                                                                                          | Unknown            |                                                                                                                                                                                                                                            | 0.31%  |                           |
| 18.117 | n-Decanoic acid                                                                                                           | Unknown            |                                                                                                                                                                                                                                            | 0.41%  |                           |
| 19.071 | trans-1,10-Dimethyl-trans-9-decalol                                                                                       | Disease resistance | Effect of volatile substances of <i>Streptomyces platensis</i> F-1 on controlof plant fungal diseases                                                                                                                                      | 9.43%  | (Wan et al., 2008)        |
| 19.93  | Benzene, 1-(1,1-dimethylethyl)-4-methoxy-                                                                                 | Disease resistance | Effect of volatile substances of <i>Streptomyces platensis</i> F-1 on controlof plant fungal diseases                                                                                                                                      | 0.81%  | (Wan et al., 2008)        |
| 20.178 | 3a,7-Methano-3aH-cyclopentacyclooctene, 1,4,5,6,7,8,9,9a-octahydro-1,1,7-trimethyl-, [3aR-(3a.alpha.,7.alpha.,9a.beta.)]- | Disease resistance | Effect of volatile substances of <i>Streptomyces platensis</i> F-1 on controlof plant fungal diseases                                                                                                                                      | 6.29%  | (Wan et al., 2008)        |
| 20.465 | Azulene, 1,2,3,5,6,7,8,8a-octahydro-1,4-dimethyl-7-(1-methylethenyl)-, [1S-(1.alpha.,7.alpha.,8a.beta.)]-                 | Disease resistance | Effect of volatile substances of <i>Streptomyces platensis</i> F-1 on controlof plant fungal diseases                                                                                                                                      | 0.61%  | (Wan et al., 2008)        |
| 20.668 | Propanamide, N-(4-methoxyphenyl)-2,2-dimethyl-                                                                            | Unknown            |                                                                                                                                                                                                                                            | 0.55%  |                           |
| 20.84  | 1-Dodecanol                                                                                                               | Unknown            |                                                                                                                                                                                                                                            | 0.40%  |                           |
| 21.782 | Phenol, 2,4-bis(1,1-dimethylethyl)-                                                                                       | Disease resistance | Effect of volatile substances of <i>Streptomyces platensis</i> F-1 on controlof plant fungal diseases                                                                                                                                      | 13.61% | (Wan et al., 2008)        |
| 22.952 | Dodecanoic acid                                                                                                           | Unknown            |                                                                                                                                                                                                                                            | 0.78%  |                           |
| 23.079 | 2-Tetradecanone                                                                                                           | Unknown            |                                                                                                                                                                                                                                            | 0.47%  |                           |
| 24.358 | 2-Naphthalenemethanol, 1,2,3,4,4a,5,6,7-octahydro-.alpha.,.alpha.,4a,8-tetramethyl-,                                      | PGPR               | Study of plant growth regulating activity of 2-[(1-naphthalen-1-yl-ethylimino)-methyl]-phenol and its transition metal complexes on <i>trigonella foenum-graecum</i> .                                                                     | 0.33%  | (Palande and Swamy, 2017) |

|        |                                                                                                                           |                    |                                                                                                                                                                                                                                            |        |                               |
|--------|---------------------------------------------------------------------------------------------------------------------------|--------------------|--------------------------------------------------------------------------------------------------------------------------------------------------------------------------------------------------------------------------------------------|--------|-------------------------------|
|        | (2R-cis)-                                                                                                                 |                    |                                                                                                                                                                                                                                            |        |                               |
| 24.778 | 2-Naphthalenemethanol, 1,2,3,4,4a,5,6,8a-octahydro-.alpha.,.alpha.,4a,8-tetramethyl-, [2R-(2.alpha.,4a.alpha.,8a.beta.)]- | Unknown            |                                                                                                                                                                                                                                            | 0.45%  |                               |
| 25.083 | Bicyclo[4.4.0]dec-1-ene, 2-isopropyl-5-methyl-9-methylene-                                                                |                    |                                                                                                                                                                                                                                            | 0.37%  |                               |
| 25.211 | (-)-.alpha.-Panasinsen                                                                                                    | Unknown            |                                                                                                                                                                                                                                            | 5.12%  |                               |
| 26.07  | Heptadecane                                                                                                               | Disease resistance | Identification of Rhizospheric Actinomycete <i>Streptomyces lavendulae</i> SPS-33 and the Inhibitory Effect of its Volatile Organic Compounds against <i>Ceratocystis fimbriata</i> in Postharvest Sweet Potato ( <i>Ipomoea batatas</i> ) | 1.05%  | (Li et al., 2020)             |
| 26.598 | Tetradecanoic acid                                                                                                        | PGPR               | Effects of Tetradecanoic Acid on Growth and Activities of Leaf Defense Enzymes of Eggplant Seedlings                                                                                                                                       | 1.51%  | (Zhou et al., 2011)           |
| 26.96  | Phenol, 4-amino-3-methyl-                                                                                                 | Unknown            |                                                                                                                                                                                                                                            | 0.26%  |                               |
| 27.361 | Tetradecanoic acid                                                                                                        | Unknown            |                                                                                                                                                                                                                                            | 1.51%  |                               |
| 28.424 | Pyrrolo[1,2-a]pyrazine-1,4-dione, hexahydro-3-(2-methylpropyl)-                                                           | Disease resistance | Volatile organic compounds produced by the phytopathogenic bacterium <i>Xanthomonas campestris</i> pv. <i>vesicatoria</i> 85-10                                                                                                            | 0.26%  | (Weise et al., 2012)          |
| 28.786 | Pentadecanoic acid                                                                                                        | Unknown            |                                                                                                                                                                                                                                            | 5.54%  |                               |
| 29.028 | Hexanedioic acid, dibutyl ester                                                                                           | Unknown            |                                                                                                                                                                                                                                            | 25.58% |                               |
| 29.238 | 2-Pentadecanone, 6,10,14-trimethyl-                                                                                       | PGPR               | Seedling growth-promoting composition, a kit, a method for applying the former, and use of the volatile organic compounds comprising the composition                                                                                       | 2.05%  | (Cortez et al.)               |
| 29.626 | Pentadecanoic acid                                                                                                        | Unknown            |                                                                                                                                                                                                                                            | 5.54%  |                               |
| 29.753 | Ethyl tridecanoate                                                                                                        | Unknown            |                                                                                                                                                                                                                                            | 0.47%  |                               |
| 31.42  | Tridecaldehyde                                                                                                            | PGPR               | Plant growth-promoting rhizobacteria modulate root-system architecture in <i>Arabidopsis thaliana</i> through volatile organic compound emission                                                                                           | 3.52%  | (Gutiérrez-Luna et al., 2010) |
| 32.68  | n-Hexadecanoic acid                                                                                                       | PGPR               | Plant Growth Promotion and Biocontrol Potential of Fungal Endophytes in the Inflorescence of <i>Aloe vera</i> L.                                                                                                                           | 6.53%  | (Chowdhary and Sharma, 2020)  |
| 33.946 | Pentafluoropropionic acid, hexadecyl ester                                                                                | Unknown            |                                                                                                                                                                                                                                            | 0.38%  |                               |
| 34.219 | 2-Cyclohexen-1-ol                                                                                                         | PGPR               | Pyrazole plant growth regulants                                                                                                                                                                                                            | 0.39%  | (Johnson and Sweetser, 1976)  |
| 34.576 | Heptadecanoic acid                                                                                                        | Unknown            |                                                                                                                                                                                                                                            | 1.76%  |                               |

- Chowdhary, K., and Sharma, S. (2020). Plant Growth Promotion and Biocontrol Potential of Fungal Endophytes in the Inflorescence of Aloe vera L. *Proceedings of the National Academy of Sciences, India Section B: Biological Sciences* 90(5), 1045-1055.
- Cortez, A.Q., Robles, P.F., and Ibañez, M.P. "SEEDLING GROWTH-PROMOTING COMPOSITION, A KIT, A METHOD FOR APPLYING THE FORMER, AND USE OF THE VOLATILE ORGANIC COMPOUNDS COMPRISING THE COMPOSITION".).
- Gutiérrez-Luna, F., López-Bucio, J., Altamirano-Hernández, J., Valencia-Cantero, E., Cruz, H., and Macías-Rodríguez, L. (2010). Plant growth-promoting rhizobacteria modulate root-system architecture in Arabidopsis thaliana through volatile organic compound emission. *Symbiosis* 51(1), 75-83.
- Johnson, A.L., and Sweetser, P.B. (1976). "Pyrazole plant growth regulants".).
- Li, C., Zhang, J., Zhao, C., Jiang, H., Ren, X., Su, W., et al. (2018). Effects of 3-methyl-1-butanol on seed germination and seedling growth of maize and wheat. *Bulletin of Botanical Research* 38(5), 785-789.
- Li, Q., Ning, P., Zheng, L., Huang, J., Li, G., and Hsiang, T. (2010). Fumigant activity of volatiles of Streptomyces globisporus JK-1 against Penicillium italicum on Citrus microcarpa. *Postharvest Biology and Technology* 58(2), 157-165. doi: <https://doi.org/10.1016/j.postharvbio.2010.06.003>.
- Li, X., Li, B., Cai, S., Zhang, Y., Xu, M., Zhang, C., et al. (2020). Identification of Rhizospheric Actinomycete Streptomyces lavendulae SPS-33 and the Inhibitory Effect of its Volatile Organic Compounds against Ceratocystis fimbriata in Postharvest Sweet Potato (Ipomoea batatas (L.) Lam.). *Microorganisms* 8(3). doi: 10.3390/microorganisms8030319.
- Palande, S.V., and Swamy, D. (2017). STUDY OF PLANT GROWTH REGULATING ACTIVITY OF 2-[(1-NAPHTHALEN-1-yl-ETHYLIMINO)-METHYL]-PHENOL AND ITS TRANSITION METAL COMPLEXES ON TRIGONELLA FOENUM-GRACUM. TRITICUM AESTIVUM AND BRASSICA NIGRA. *Acta Ciencia Indica* 43(3), 425-430.
- Pollak, F.C., and Berger, R.G. (1996). Geosmin and Related Volatiles in Bioreactor-Cultured Streptomyces citreus CBS 109.60. *Applied and Environmental Microbiology* 62(4), 1295-1299. doi: doi:10.1128/aem.62.4.1295-1299.1996.
- Rivas, G.L., Camarena-Pozos, D.A., Pérez, M., Cabriaes, J., and Martinez, L. (2018). Identification of microbial volatile organic compounds and their effect in A. thaliana's growth. *Ingeniería e Investigación* 3(30), 41.
- Sunesson, A.-L., Nilsson, C.-A., Carlson, R., Blomquist, G., and Andersson, B. (1997). Production of volatile metabolites from streptomyces albidoflavus cultivated on gypsum board and tryptone glucose extract agar-influence of temperature, oxygen and carbon dioxide levels. *The Annals of Occupational Hygiene* 41(4), 393-413. doi: [https://doi.org/10.1016/S0003-4878\(96\)00046-4](https://doi.org/10.1016/S0003-4878(96)00046-4).
- Wan, M., Li, G., Zhang, J., Jiang, D., and Huang, H.C. (2008). Effect of volatile substances of Streptomyces platensis F-1 on control of plant fungal diseases. *Biological Control* 46(3), 552-559.
- Weise, T., Kai, M., Gummesson, A., Troeger, A., von Reuß, S., Piepenborn, S., et al. (2012). Volatile organic compounds produced by the phytopathogenic bacterium Xanthomonas campestris pv. vesicatoria 85-10. *Beilstein Journal of Organic Chemistry* 8(1), 579-596.
- Zhou, B., Jianxia, W.U., Yuling, Y., Lin, H., and Chuanqi, S. (2011). Effects of Tetradecanoic Acid on Growth and Activities of Leaf Defense Enzymes of Eggplant Seedlings. *Acta Agriculturae Boreali-Occidentalis Sinica*.
